# Supplementary material
Source: Springer Nature journal article supplement (https://www.springermedizin.de/resource/supplementary/12888_2008_514_MOESM10_ESM.pdf/9483474)

Any substance use disorder (lifetime prevalence) in men and women

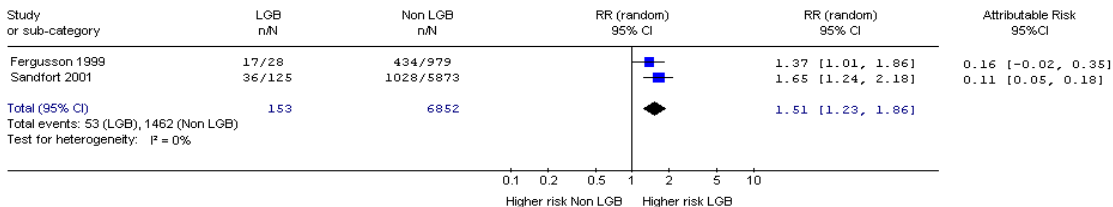

Any substance use disorder (12 months prevalence) in men and women

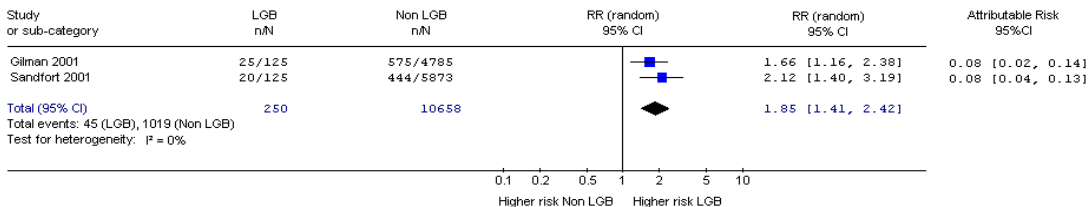

Any substance use disorder (12 months prevalence) in men only

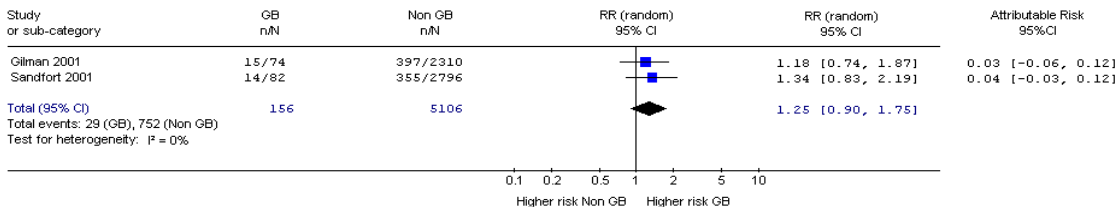

Any substance use disorder (12 months prevalence) in women only

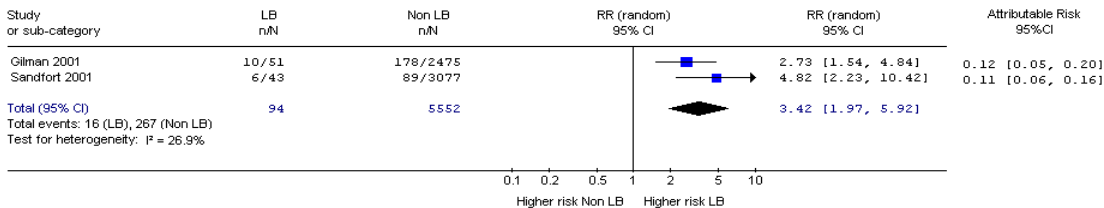

Supplement: MOESM10 [file 9483474]
